# Supplementary material
Source: Springer Nature journal article supplement (https://www.springermedizin.de/resource/supplementary/13256_2011_2051_MOESM1_ESM.pdf/9649758)

Timeline

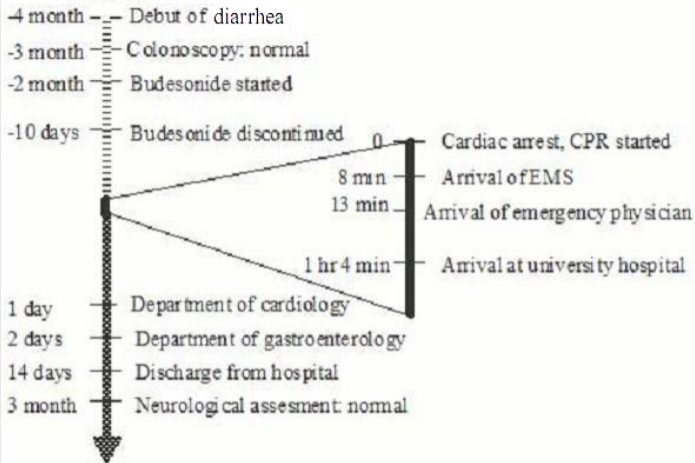

Supplement: MOESM1 [file 9649758]
